# Supplementary material for: Alkali-induced crumpling of Ti3C2Tx(MXene) to form 3D porous networks for sodium ion storage
Source: Royal Society of Chemistry journal article supplement (doi:10.1039/c8cc00649k), 2018-01-01
Supplement: c8cc00649k1.pdf [file c8cc00649k1.pdf]

Electronic Supplementary Material (ESI) for ChemComm.  
This journal is © The Royal Society of Chemistry 2018

## Supplementary information

### **Alkali-Induced Crumpling of $\text{Ti}_3\text{C}_2\text{T}_x$ (MXene) to Form 3D Porous Networks for Sodium Ion Storage**

Di Zhao,<sup>a</sup> Mallory Clites,<sup>a</sup> Guobing Ying,<sup>a</sup> Sankalp Kota,<sup>a</sup> Jie Wang,<sup>b</sup> Varun Natu,<sup>a</sup> Xin Wang,<sup>b</sup> Ekaterina

Pomerantseva,<sup>a</sup> Minhua Cao,<sup>\*b</sup> and Michel W. Barsoum<sup>\*a</sup>

<sup>a</sup> Department of Materials Science and Engineering, Drexel University, Philadelphia, PA 19104

<sup>b</sup> Key Laboratory of Cluster Science, Ministry of Education of China, Beijing Key Laboratory of Photoelectronic/Electrophotonic Conversion Materials, School of Chemistry and Chemical Engineering, Beijing Institute of Technology, Beijing 100081, P. R. China.

## Experimental Details

### Preparation of $\text{Ti}_3\text{AlC}_2$ .

Powders of  $\text{Ti}_3\text{AlC}_2$  were prepared by mixing commercial  $\text{Ti}_2\text{AlC}$  powders (Kanthal, Sweden) with  $\text{TiC}$  in a 1:1 molar ratio (after adjusting for the  $\approx 10$  wt%  $\text{Ti}_3\text{AlC}_2$  already present in the commercial powder) followed by ball milling for 1 day. The mixture was placed in an alumina boat and heated at a rate of  $5\text{ }^\circ\text{C}/\text{min}$  under continuous Ar flow to  $1350\text{ }^\circ\text{C}$  and held at that temperature for 2 h. The resulting loosely sintered brick was ground with a TiN-coated milling bit and sieved through a 400 mesh sieve producing a powder with a particle size less  $< 38\text{ }\mu\text{m}$ .

### Preparation of delaminated $\text{Ti}_3\text{C}_2\text{T}_x$ MXene suspension

Typically, 0.99 g of LiF (Alfa Aesar, 98.5%) was dissolved in 10 mL of 12 M HCl. Then 1 g of sieved  $\text{Ti}_3\text{AlC}_2$  powders was added. The mixture was kept at  $35\text{ }^\circ\text{C}$  for 24 h while stirring with a magnetic stirrer. The resulting solid residue was washed several times with deionized water and centrifuged at a speed of 3500 rpm (3 min for each cycle) until the pH of the supernatant was about 6. The resulting powder was mixed with about 40 ml of distilled water and sonicated for 1 h under an ice-bath through which Ar gas was bubbled. The resulting solution was centrifuged for 40 min at a speed of 3500 rpm. Finally, the supernatant colloidal suspension, containing delaminated, mostly single, 2D  $\text{Ti}_3\text{C}_2\text{T}_x$  flakes, was obtained.

To determine the volumetric density, a syringe was used to pull out 3 ml of the colloidal suspension to filter a film. The remaining suspension was stored in sealed bottles under Ar for further experiments. After drying in air, weighed it. For all the work carried out herein, the as-produced  $\text{Ti}_3\text{C}_2\text{T}_x$  MXene solution concentration was about  $15\text{ mg ml}^{-1}$ .

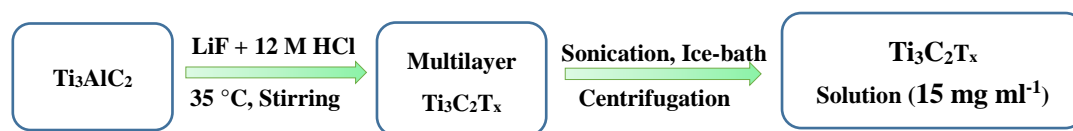

Scheme S1. Preparation steps for MXene nanosheets.

### Electrostatic assembly of $\text{Ti}_3\text{C}_2\text{T}_x$ with cations.

The  $\approx 15\text{ mg ml}^{-1}$  colloidal suspension was then mixed, at room temperature, with 1 M solutions of KOH, LiOH and NaOH. And also mixed with  $\text{NH}_4\text{OH}$  (25~28%) and TBAOH (1.5 M). For 2 ml MXene solution, adding about 2 ml alkaline solutions. This resulted in the immediate flocculation of the  $\text{Ti}_3\text{C}_2\text{T}_x$  nanosheets. The flocculated deposit was separated from its solution by centrifugation. They were then washed with water one time and ethanol until neutral without shaking very strongly. The resulting materials were dried in a dryer.

### Materials Characterization

Powder X-ray diffraction (XRD) was performed on a Rigaku Smart Lab (Tokyo, Japan) diffractometer using  $\text{Cu K}\alpha$  radiation (40 KV and 44 mA) and step scan  $0.02^\circ$ ,  $3^\circ$ - $65^\circ$  2 theta range and a step time of 0.5 s.

The zeta,  $\zeta$ , potential measurements were conducted using a Zetasizer Nano ZS apparatus from Malvern Instruments. First, we ground the flocculation products in a mortar and pestle, and then dispersed a small amount in water solution using ultrasound. Finally, getting about  $280\text{ }\mu\text{l}$  using microsyringe to test it.

The structure and morphology of the materials were examined with Scanning Electron

Microscopy (SEM), Energy-Dispersive Spectroscopy (EDS) and Transmission electron microscopy (TEM). SEM and EDS were performed on a Zeiss Supra 50VP (Carl Zeiss AG, Germany). The TEM was a JEOL JEM-2010.

Atomic force microscopy (AFM) images were obtained by Bruker DI MultiMode-8 system under tapping mode. First, we ground the flocculation products into a fine powder and then dispersed a little of it in water under ultrasound. Water was then added to about 2 ml of supernatant to create a very dilute suspension. A drop of that dilute suspension was dropped on a clean mica sheet, and its thickness was measured.

Brunauer-Emmett-Teller (BET) isotherms and specific surface area (BET surface area) were performed on a Kubo X1000 instrument at 77 K. Pore size distribution and pore volume were derived using the analysis methods of Barrette-Joynere-Halenda (BJH).

**Electrochemical Measurements of  $c\text{-Ti}_3\text{C}_2\text{T}_x$  as a Na Ion Electrode:** The electrochemical tests were performed at room temperature using coin cells (CR2025) on LAND CT2001A, with a cutoff voltage of 0.01-3.00 V vs. Na/Na<sup>+</sup>.

The anodes were prepared by mixing, dried Na- $c\text{-Ti}_3\text{C}_2\text{T}_x$  powders, conductive carbon black, and sodium carboxymethyl cellulose (CMC) in a 80:10:10 weight ratio in a mortar and pestle. Deionized water was used as the solvent to make a homogeneous slurry. The resulting slurry was uniformly pasted on a Cu foil and dried at 60 °C for 12 h and then at 120 °C for another 12 h in a vacuum oven. Final cell assembly was carried out in an Ar-filled glovebox.

The loading of the active material was about 0.8 mg cm<sup>-2</sup>. Here Na metal functioned as both counter and reference electrodes. A 1 M NaClO<sub>4</sub> in a mixture of EC/dimethyl carbonate (1:1 by volume) with 5 wt.% fluoroethylene carbonate (FEC) acted as the electrolyte. The galvanostatic charge/discharge performance was investigated with a voltage cut off of 0.01-3.00 V (vs. Na/Na<sup>+</sup>). CV curves were measured by a CHI-760E electrochemical workstation with a scan rate of 0.2 mV s<sup>-1</sup>.

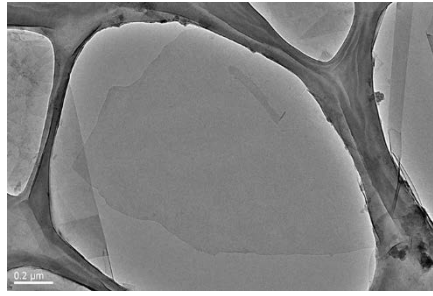

**Fig. S1** Typical TEM image of exfoliated  $\text{Ti}_3\text{C}_2\text{T}_x$  nanosheets produced by sonication.

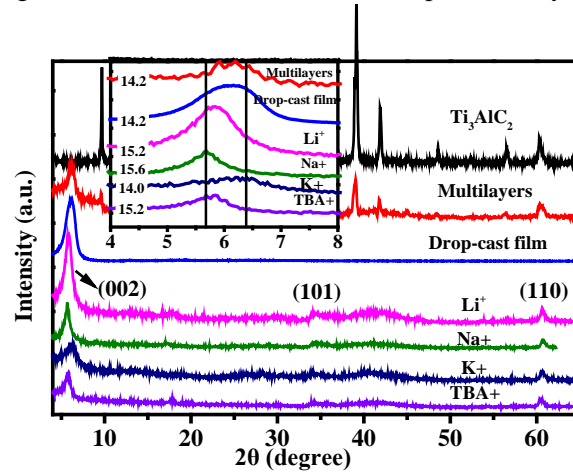

**Fig. S2** XRD patterns of (from top to bottom)  $\text{Ti}_3\text{AlC}_2$ ,  $\text{Ti}_3\text{C}_2\text{T}_x$  multilayers, drop cast film,  $\text{Li}-c\text{-Ti}_3\text{C}_2\text{T}_x$ ,  $\text{Na}-c\text{-Ti}_3\text{C}_2\text{T}_x$ ,  $\text{K}-c\text{-Ti}_3\text{C}_2\text{T}_x$  and,  $\text{TBA}-c\text{-Ti}_3\text{C}_2\text{T}_x$ . Note peak at  $2\theta \approx 61^\circ$  in all but  $c$ . Inset shows low angle results. The numbers in inset are the  $d_{02}$  values calculated from the (002) peak positions. They fall in two groups, separated by  $\approx 1 \text{ \AA}$ . Vertical lines in inset are guides to the eyes.

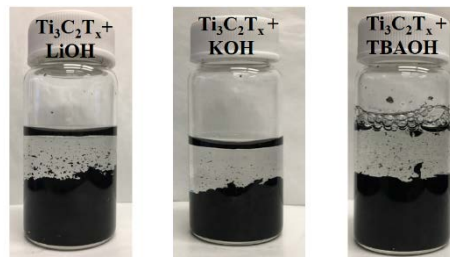

**Fig. S3** Pictures of flocculation products obtained when  $\text{Ti}_3\text{C}_2\text{T}_x$  colloidal solutions after the addition of  $\text{LiOH}$ ,  $\text{KOH}$  and  $\text{TBAOH}$ .

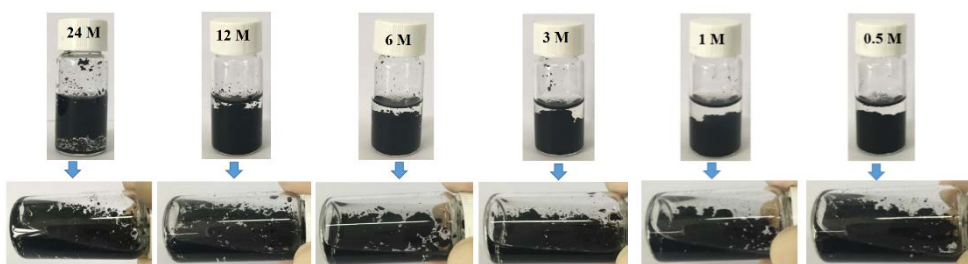

**Fig. S4** Photograph of Na-Ti<sub>3</sub>C<sub>2</sub>T<sub>x</sub> 3D framework with different NaOH concentrations from 0.5 M to 24 M. In all cases, the Ti<sub>3</sub>C<sub>2</sub>T<sub>x</sub> flakes readily flocculated and crashed out of solution.

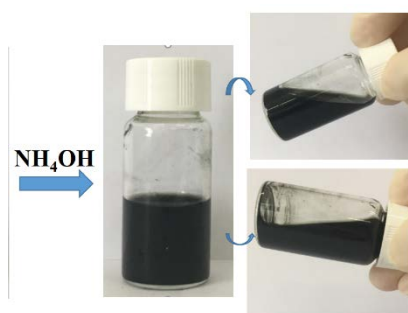

**Fig. S5** Photographs showing absence of flocculation when NH<sub>4</sub>OH is added to a Ti<sub>3</sub>C<sub>2</sub>T<sub>x</sub> colloidal solution.

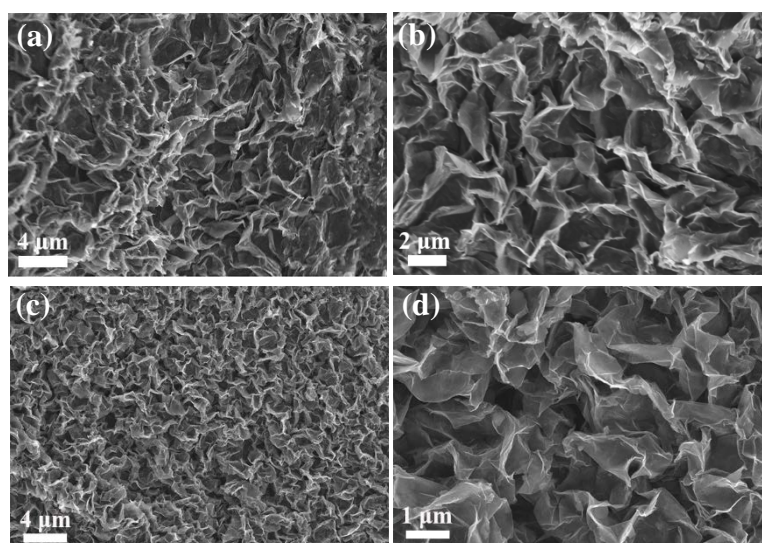

**Fig. S6** Low and high magnification SEM micrographs of products obtained when (a,b) LiOH and (c,d) KOH solutions are added to a colloidal suspension of Ti<sub>3</sub>C<sub>2</sub>T<sub>x</sub>.

(a)

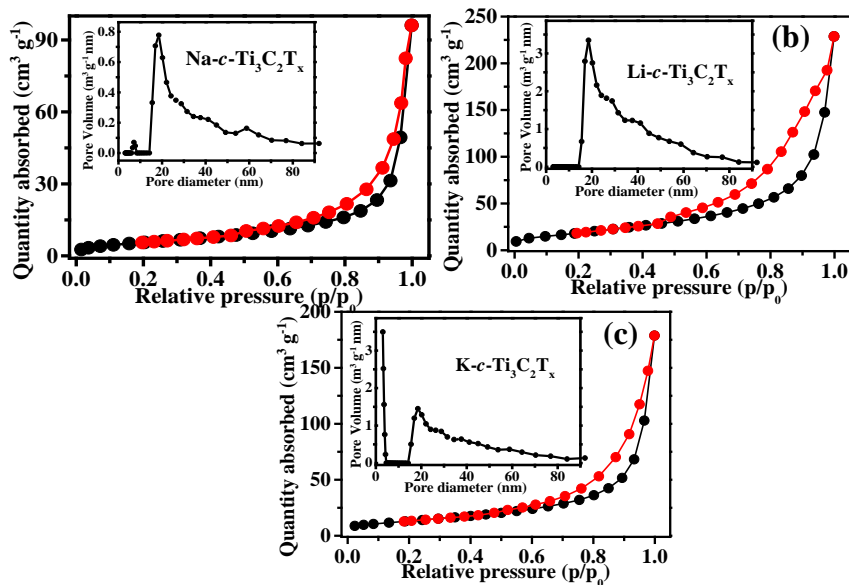

**Fig. S7 (a,b,c)** N<sub>2</sub> adsorption–desorption isotherms and pore distribution curves calculated by the NLDFT method for, a) Na-*c*-Ti<sub>3</sub>C<sub>2</sub>T<sub>x</sub>, b) Li-*c*-Ti<sub>3</sub>C<sub>2</sub>T<sub>x</sub> and, c) K-*c*-Ti<sub>3</sub>C<sub>2</sub>T<sub>x</sub>.

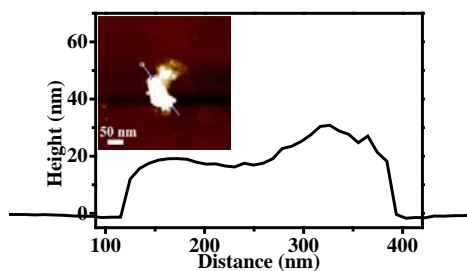

**Fig. S8** Height profile measured along the white line shown in inset AFM image.

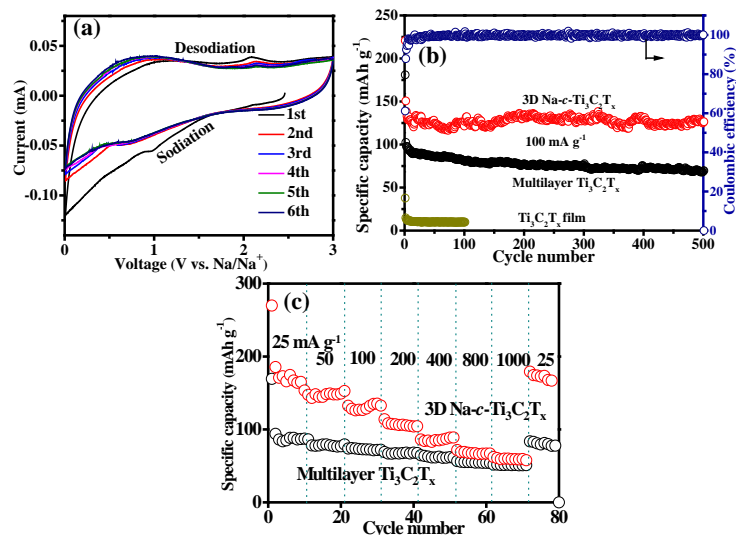

**Fig. S9** (a) CV curves of Na-*c*-Ti<sub>3</sub>C<sub>2</sub>T<sub>x</sub> at a scan rate of 0.2 mV s<sup>-1</sup>. (b) Cycling stability of Na-*c*-Ti<sub>3</sub>C<sub>2</sub>T<sub>x</sub>, ML-Ti<sub>3</sub>C<sub>2</sub>T<sub>x</sub> and Ti<sub>3</sub>C<sub>2</sub>T<sub>x</sub> film electrodes at a current density of 100 mA g<sup>-1</sup>. (c) Rate performance of Na-*c*-Ti<sub>3</sub>C<sub>2</sub>T<sub>x</sub> and ML-Ti<sub>3</sub>C<sub>2</sub>T<sub>x</sub> electrodes.

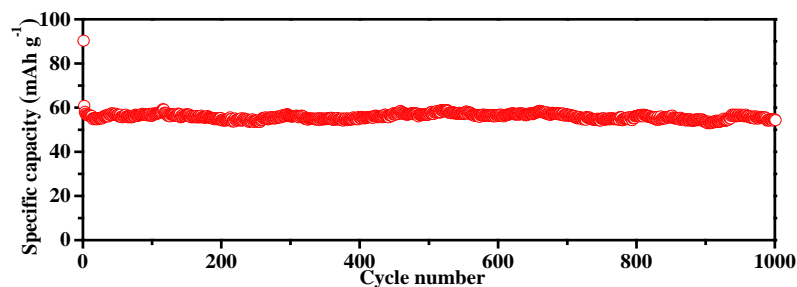

**Fig. S10** Cycling performance at a current density of  $1.5 \text{ A g}^{-1}$  for Na-*c*- $\text{Ti}_3\text{C}_2\text{T}_x$ .

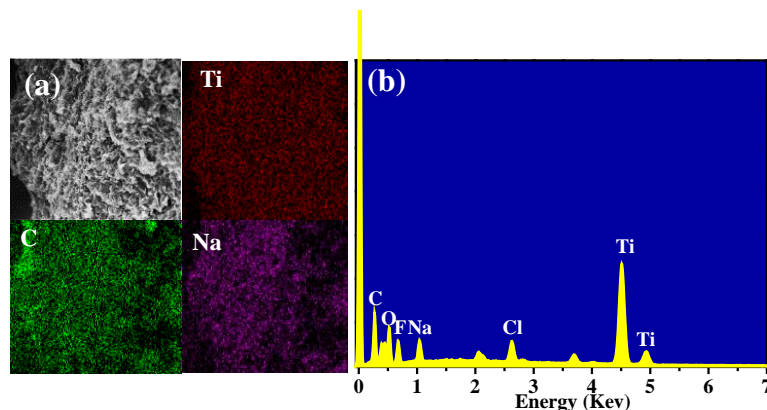

**Fig. S11** (a) SEM image and elemental maps of Ti, C and Na in Na-*c*- $\text{Ti}_3\text{C}_2\text{T}_x$  flocculated network. (b) EDS spectrum of Na- $\text{Ti}_3\text{C}_2\text{T}_x$  flocculation with NaOH solution.

**Table S1** Elements contents of Na- $\text{Ti}_3\text{C}_2\text{T}_x$  flocculation with NaOH solution getting from EDS spectrum.

| Elements         | C     | O     | F    | Na   | Cl   | Ti    | Total  |
|------------------|-------|-------|------|------|------|-------|--------|
| wt%              | 9.18  | 11.92 | 6.43 | 2.34 | 3.56 | 66.58 | 100.00 |
| Atomic ratio (%) | 22.22 | 21.66 | 9.84 | 2.96 | 2.92 | 40.41 | 100.00 |

**Table S2** Comparison of the capacity of 3D Na-*c*- $\text{Ti}_3\text{C}_2\text{T}_x$  in this work with those of other reported  $\text{Ti}_3\text{C}_2\text{T}_x$  or other MXene materials as anodes for SIBs.

| Materials                                                              | Capacity [mAh g <sup>-1</sup> ] | Current density [mA g <sup>-1</sup> ] | Cycle number | Year      | Ref. |
|------------------------------------------------------------------------|---------------------------------|---------------------------------------|--------------|-----------|------|
| 3D Na- <i>c</i> - $\text{Ti}_3\text{C}_2\text{T}_x$                    | 151                             | 25                                    | 10           |           |      |
|                                                                        | 130                             | 100                                   | 500          |           |      |
|                                                                        | 54                              | 1500                                  | 1000         |           |      |
| 3D Li- <i>c</i> - $\text{Ti}_3\text{C}_2\text{T}_x$                    | 200                             | 100                                   | 100          | This work | 100  |
|                                                                        | 167                             | 100                                   | 300          | This work | 300  |
| 3D K- <i>c</i> - $\text{Ti}_3\text{C}_2\text{T}_x$                     | 100                             | 100                                   | 100          |           |      |
|                                                                        | 105                             | 100                                   | 300          |           |      |
| Multilayer $\text{Ti}_3\text{C}_2\text{T}_x$                           | 79                              | 100                                   | 120          | 2014      | 1    |
| Na <sup>+</sup> insertion multilayer $\text{Ti}_3\text{C}_2\text{T}_x$ | 100                             | 20                                    | 100          | 2016      | 2    |

|                                                                     |      |     |      |      |   |
|---------------------------------------------------------------------|------|-----|------|------|---|
| Alkalized Ti <sub>3</sub> C <sub>2</sub> T <sub>x</sub> nanoribbons | 113  | 50  | 200  | 2017 | 3 |
|                                                                     | 53   | 200 | 500  |      |   |
| Ti <sub>3</sub> C <sub>2</sub> T <sub>x</sub> MXene                 | 100  | 50  | 200  | 2015 | 4 |
|                                                                     | 68.3 | 200 | 1000 |      |   |
| Hollow Ti <sub>3</sub> C <sub>2</sub> T <sub>x</sub> spheres        | 210  | 500 | 1000 | 2017 | 5 |
| Hollow Mo <sub>2</sub> CT <sub>x</sub> spheres                      | 210  | 500 | 1000 |      |   |
| Multilayer V <sub>2</sub> CT <sub>x</sub>                           | 75   | 30  | 50   | 2015 | 6 |
|                                                                     | 67   | 30  | 100  |      |   |
| Ti <sub>2</sub> CT <sub>x</sub>                                     | 143  | 20  | 100  | 2015 | 7 |

**Table S3** Comparison of  $d_{c/2}$  values in Å, for 3D Na-c-Ti<sub>3</sub>C<sub>2</sub>T<sub>x</sub> measured in this work and those reported cations intercalated Ti<sub>3</sub>C<sub>2</sub>T<sub>x</sub> MXene.

| Materials                                                                                       | c-LP (Å) | Ref.      |
|-------------------------------------------------------------------------------------------------|----------|-----------|
| 3D Na-c-Ti <sub>3</sub> C <sub>2</sub> T <sub>x</sub>                                           | 15.6     | This work |
| Ti <sub>3</sub> C <sub>2</sub> MXene nanoribbons                                                | 12.5     | 3         |
| Cations intercalated MXene with                                                                 |          |           |
| KOH                                                                                             | 10.15    | 8         |
| NH <sub>4</sub> OH                                                                              | 12.7     | 8         |
| Ti <sub>2</sub> CT <sub>x</sub>                                                                 | 10.1     | 7         |
| Ti <sub>3</sub> C <sub>2</sub> T <sub>x</sub> treated with Hydrazine                            | 12.74    | 9         |
| Ti <sub>3</sub> C <sub>2</sub> T <sub>x</sub> treated in DMF                                    | 13.4     | 9         |
| MXene Ti <sub>3</sub> C <sub>2</sub> T <sub>x</sub> in a nonaqueous Na <sup>+</sup> electrolyte | 12.5     | 2         |

## References

- (1) Y. Xie, Y. Dall'Agnesse, M. Naguib, Y. Gogotsi, M. W. Barsoum, H. L. Zhuang, P. R. C. Kent, *ACS nano*, 2014, **8**, 9606–9615.
- (2) S. Kajiyama, L. Szabova, K. Sodeyama, H. Iinuma, R. Morita, K. Gotoh, Y. Tateyama, M. Okubo, A. Yamada, *ACS Nano*, 2016, **10**, 3334-3341.
- (3) P. Lian, Y. Dong, Z. S. Wu, S. Zheng, X. Wang, W. Sen, C. Sun, J. Qin, X. Shi, X. Bao, *Nano Energy*, 2017, **40**, 1-8.
- (4) X. Wang, X. Shen, Y. Gao, Z. Wang, R. Yu, L. Chen, *J. Am. Chem. Soc.*, 2015, **137**, 2715-2721.
- (5) M. Q. Zhao, X. Xie, C. E. Ren, T. Makaryan, B. Anasori, G. Wang, Y. Gogotsi, *Adv. Mater.*, 2017, **29**, 1702410.
- (6) Y. Dall'Agnesse, P. L. Taberna, Y. Gogotsi, P. Simon, *J. Phys. Chem. Lett.*, 2015, **6**, 2305-2309.
- (7) X. Wang, S. Kajiyama, H. Iinuma, E. Hosono, S. Oro, I. Moriguchi, M. Okubo, A. Yamada, *Nat. Commun.*, 2015, **6**, 6544.
- (8) M. R. Lukatskaya, O. Mashtalir, C. E. Ren, Y. Dall'Agnesse, P. Rozier, P. L. Taberna, M. Naguib, P. Simon, M. W. Barsoum, Y. Gogotsi. *Science*, 2013, **341**, 1502-1505.
- (9) O. Mashtalir, M. Naguib, V. N. Mochalin, Y. Dall'Agnesse, M. Heon, M. W. Barsoum, Y. Gogotsi, *Nat. Commun.*, 2013, **4**, 1716.
